# Supplementary material for: Perpendicular growth of few-layered MoS2 nanosheets on MoO3 nanowires fabricated by direct anion exchange reactions for high-performance lithium-ion batteries
Source: Royal Society of Chemistry journal article supplement (doi:10.1039/c6ta06741g), 2016-01-01
Supplement: c6ta06741g1.pdf [file c6ta06741g1.pdf]

### Supporting Information

Perpendicular growth of few-layers MoS<sub>2</sub> nanosheets on MoO<sub>3</sub> nanowires fabricated  
by direct anion exchange reactions for high-performance lithium-ion batteries

Hui Liu<sup>\*a</sup>, Xianjin Chen<sup>a</sup>, Lu Deng<sup>a</sup>, Meng Ding<sup>a</sup>, Junqi Li<sup>a</sup> and Xuanmeng He<sup>a</sup>

School of Materials Science and Engineering, Shaanxi University of Science and Technology

Xi'an 710021, P. R. China

---

\*Corresponding author. Tel: +86-29-86177018; Fax: +86-29-86177018.

Email address: [liuhui@sust.edu.cn](mailto:liuhui@sust.edu.cn);

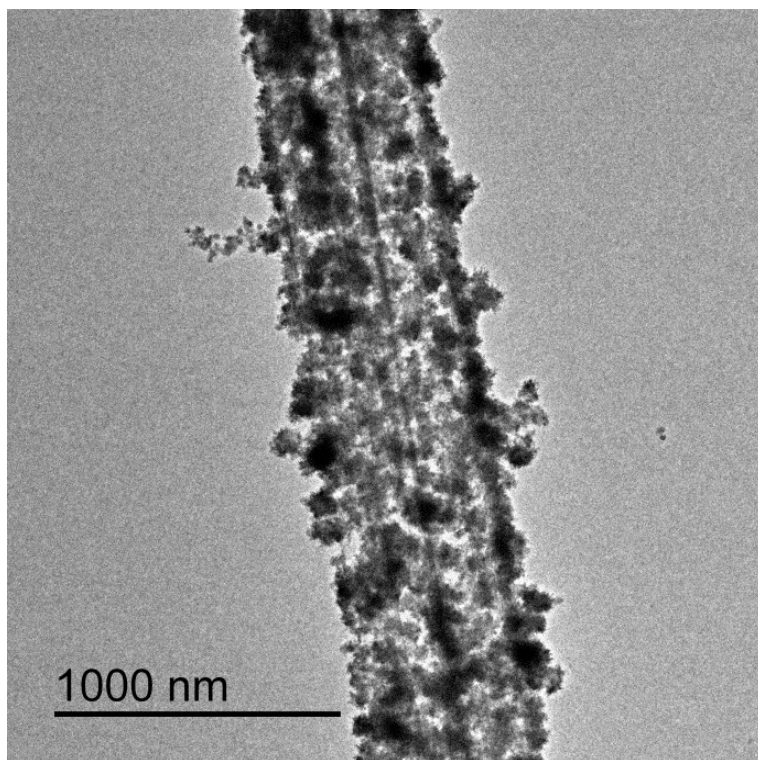

**Figure S1** TEM image of the obtained MoO<sub>3</sub>@MoS<sub>2</sub> composite when the amount of thiourea is 10 mM

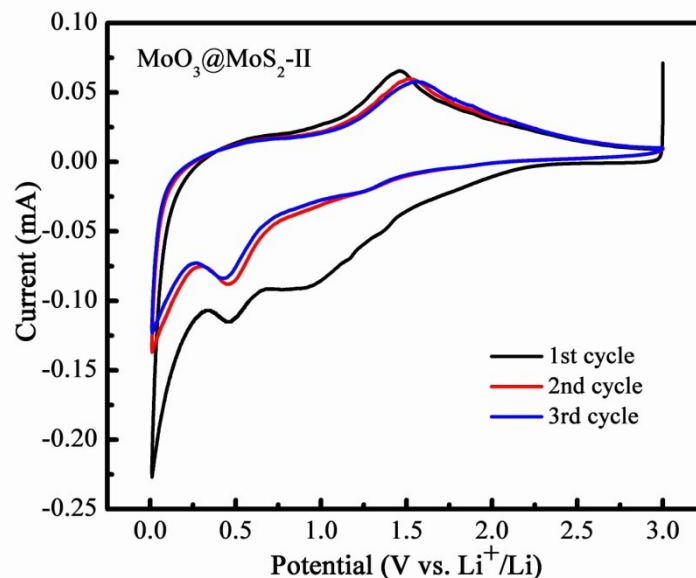

**Figure S2** CV curves of MoO<sub>3</sub>@MoS<sub>2</sub>-II electrodes.

**Figure S2** showed the first three cycles of MoO<sub>3</sub>@MoS<sub>2</sub>-II electrode, in the first reduction cycle, the peak at about 1.0V is associated with the intercalation of Li<sup>+</sup> into the interlayer of the MoS<sub>2</sub>, and the peak at 0.50 V may be attributed to that Li<sub>x</sub>MoS<sub>2</sub> converted to Mo and Li<sub>2</sub>S and also Li<sub>x</sub>MoO<sub>3</sub> to Mo and Li<sub>2</sub>O. There was an indistinct peak at about 1.75V corresponding to the insertion process of Li<sup>+</sup> into the crystalline MoO<sub>3</sub> to form a Li<sub>x</sub>MoO<sub>3</sub> solid solution. In the anode cycles, there was a peak at about 1.5V corresponding to the oxidation of Mo to MoS<sub>2</sub>. From the CV curves of MoO<sub>3</sub>@MoS<sub>2</sub>-II electrodes, it can be infer that the main electrode reactions during the first three cycles were composed of the intercalation of Li<sup>+</sup> into the interlayer of the MoS<sub>2</sub>, and then transformed into Mo and Li<sub>2</sub>S, and the oxidation of Mo to MoS<sub>2</sub>. Such electrode reactions cycles resulted in the capacity loss and relatively low Coulombic efficiency during the first three cycles (Seen in **Figure 8b**). The CV curves were agreed with the charge/discharge curves in **Figure 8a**.

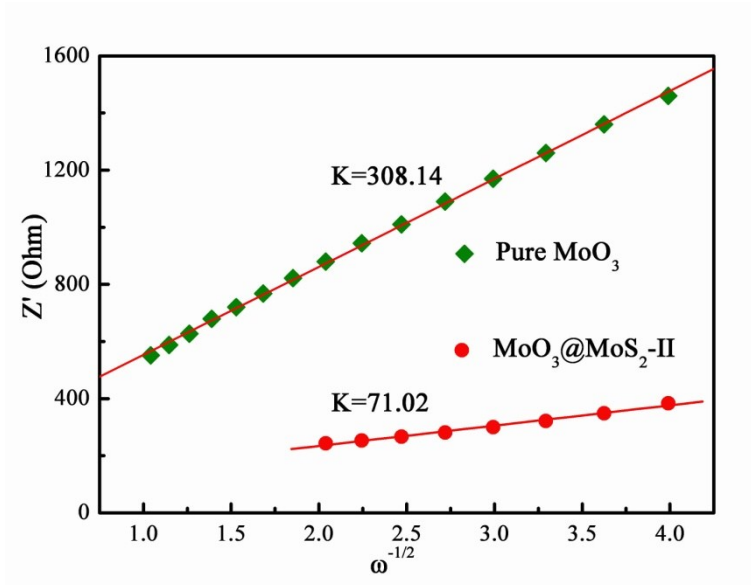

**Figure S3** Linear fit of the relation of  $Z'$  and  $\omega^{-1/2}$  at low frequency of pure MoO<sub>3</sub> and MoO<sub>3</sub>@MoS<sub>2</sub>-II electrodes.
